# Supplementary material for: Effects of COVID-19 on University Student Food Security
Source: Nutrients. 2021 Jun 4;13(6):1932. doi: 10.3390/nu13061932 (PMC8229979; doi:10.3390/nu13061932)
Supplement: Supplementary file 1 [file nutrients-13-01932-s001.zip › nutrients-1206523-supplementary.pdf]

**Table S1.** Consumption frequency of individual food items of Midwestern university students by residence and food security status post-COVID-19 campus shift to online instruction ( $n=1434$ ).

|                            | Residence |                   |                   | <i>p</i> | Food Security Status    |                         | <i>p</i> |
|----------------------------|-----------|-------------------|-------------------|----------|-------------------------|-------------------------|----------|
|                            | Total (%) | At Home 53% (759) | On Own 47% (675)  |          | Food Secure 83% (1,184) | Food Insecure 17% (250) |          |
|                            | ← % →     |                   |                   |          | ← % →                   |                         |          |
| Fruit juice                |           |                   |                   | <.001    |                         |                         | .626     |
| < 1 time per week          | 47.4      | 41.8 <sub>a</sub> | 53.6 <sub>b</sub> |          | 48.1                    | 43.6                    |          |
| Once per week              | 17.7      | 19.0 <sub>a</sub> | 16.3 <sub>a</sub> |          | 17.1                    | 20.4                    |          |
| 2-3 times per week         | 18.8      | 20.6 <sub>a</sub> | 16.9 <sub>a</sub> |          | 18.6                    | 20.0                    |          |
| 4-6 times per week         | 7.9       | 9.5 <sub>a</sub>  | 6.1 <sub>b</sub>  |          | 7.8                     | 8.4                     |          |
| 1 or more times per day    | 8.2       | 9.2 <sub>a</sub>  | 7.1 <sub>a</sub>  |          | 8.4                     | 7.6                     |          |
| Whole fruit                |           |                   |                   | <.001    |                         |                         | <.001    |
| < 1 time per week          | 8.9       | 6.6 <sub>a</sub>  | 11.4 <sub>b</sub> |          | 7.1 <sub>a</sub>        | 17.2 <sub>b</sub>       |          |
| Once per week              | 12.9      | 9.9 <sub>a</sub>  | 16.3 <sub>b</sub> |          | 11.8 <sub>a</sub>       | 18.0 <sub>b</sub>       |          |
| 2-3 times per week         | 23.8      | 21.1 <sub>a</sub> | 27.0 <sub>b</sub> |          | 23.1 <sub>a</sub>       | 27.2 <sub>a</sub>       |          |
| 4-6 times per week         | 22.6      | 26.1 <sub>a</sub> | 18.7 <sub>b</sub> |          | 23.6 <sub>a</sub>       | 18.0 <sub>a</sub>       |          |
| 1 or more times per day    | 31.8      | 36.4 <sub>a</sub> | 26.7 <sub>b</sub> |          | 34.4 <sub>a</sub>       | 19.6 <sub>b</sub>       |          |
| Vegetable juice            |           |                   |                   | .837     |                         |                         | .001     |
| < 1 time per week          | 88.9      | 88.1              | 89.8              |          | 90.4 <sub>a</sub>       | 82.0 <sub>b</sub>       |          |
| Once per week              | 5.2       | 5.5               | 4.7               |          | 4.7 <sub>a</sub>        | 7.2 <sub>a</sub>        |          |
| 2-3 times per week         | 3.3       | 3.7               | 2.8               |          | 2.9 <sub>a</sub>        | 5.2 <sub>a</sub>        |          |
| 4-6 times per week         | 1.0       | 0.9               | 1.0               |          | 0.7 <sub>a</sub>        | 2.4 <sub>b</sub>        |          |
| 1 or more times per day    | 1.7       | 1.7               | 1.6               |          | 1.4 <sub>a</sub>        | 3.2 <sub>b</sub>        |          |
| Potatoes                   |           |                   |                   | <.001    |                         |                         | .588     |
| < 1 time per week          | 10.0      | 5.5 <sub>a</sub>  | 15.0 <sub>b</sub> |          | 9.6                     | 11.6                    |          |
| Once per week              | 23.2      | 20.4 <sub>a</sub> | 26.4 <sub>b</sub> |          | 24.0                    | 19.6                    |          |
| 2-3 times per week         | 41.2      | 42.0 <sub>a</sub> | 40.3 <sub>a</sub> |          | 40.8                    | 43.2                    |          |
| 4-6 times per week         | 20.2      | 24.8 <sub>a</sub> | 15.0 <sub>b</sub> |          | 20.2                    | 20.0                    |          |
| 1 or more times per day    | 5.4       | 7.2 <sub>a</sub>  | 3.4 <sub>b</sub>  |          | 5.4                     | 5.6                     |          |
| Green salad                |           |                   |                   | <.001    |                         |                         | .277     |
| < 1 time per week          | 28.3      | 23.3 <sub>a</sub> | 33.9 <sub>b</sub> |          | 27.4                    | 32.8                    |          |
| Once per week              | 25.8      | 25.4 <sub>a</sub> | 26.2 <sub>a</sub> |          | 25.5                    | 27.2                    |          |
| 2-3 times per week         | 26.6      | 28.6 <sub>a</sub> | 24.4 <sub>a</sub> |          | 27.1                    | 24.4                    |          |
| 4-6 times per week         | 11.2      | 13.0 <sub>a</sub> | 9.2 <sub>b</sub>  |          | 11.7                    | 8.8                     |          |
| 1 or more times per day    | 8.0       | 9.6 <sub>a</sub>  | 6.2 <sub>b</sub>  |          | 8.3                     | 6.8                     |          |
| Vegetable stews            |           |                   |                   | <.001    |                         |                         | .290     |
| < 1 time per week          | 57.3      | 57.0 <sub>a</sub> | 57.6 <sub>a</sub> |          | 57.4                    | 56.8                    |          |
| Once per week              | 26.5      | 30.0 <sub>a</sub> | 22.5 <sub>b</sub> |          | 27.2                    | 23.2                    |          |
| 2-3 times per week         | 11.7      | 9.6 <sub>a</sub>  | 14.1 <sub>b</sub> |          | 11.3                    | 13.6                    |          |
| 4-6 times per week         | 2.7       | 2.4 <sub>a</sub>  | 3.1 <sub>a</sub>  |          | 2.5                     | 3.6                     |          |
| 1 or more times per day    | 1.7       | 0.9 <sub>a</sub>  | 2.7 <sub>b</sub>  |          | 1.5                     | 2.8                     |          |
| Other vegetables           |           |                   |                   | .001     |                         |                         | <.001    |
| < 1 time per week          | 6.1       | 4.7 <sub>a</sub>  | 7.6 <sub>b</sub>  |          | 5.2 <sub>a</sub>        | 10.4 <sub>b</sub>       |          |
| Once per week              | 10.5      | 8.0 <sub>a</sub>  | 13.3 <sub>b</sub> |          | 9.1 <sub>a</sub>        | 17.2 <sub>b</sub>       |          |
| 2-3 times per week         | 29.8      | 31.0 <sub>a</sub> | 28.4 <sub>a</sub> |          | 29.5 <sub>a</sub>       | 31.2 <sub>a</sub>       |          |
| 4-6 times per week         | 22.0      | 23.7 <sub>a</sub> | 20.0 <sub>a</sub> |          | 22.8 <sub>a</sub>       | 18.0 <sub>a</sub>       |          |
| 1 or more times per day    | 31.7      | 32.5 <sub>a</sub> | 30.7 <sub>a</sub> |          | 33.4 <sub>a</sub>       | 23.2 <sub>b</sub>       |          |
| Fiber cereals              |           |                   |                   | .163     |                         |                         | .228     |
| < 1 time per week          | 63.7      | 62.5              | 65.0              |          | 64.8                    | 58.4                    |          |
| Once per week              | 13.5      | 14.0              | 12.9              |          | 13.3                    | 14.0                    |          |
| 2-3 times per week         | 13.6      | 14.4              | 12.7              |          | 13.3                    | 15.2                    |          |
| 4-6 times per week         | 5.2       | 4.3               | 6.2               |          | 4.7                     | 7.6                     |          |
| 1 or more times per day    | 4.0       | 4.9               | 3.1               |          | 3.9                     | 4.8                     |          |
| Beans, peas, lentils, etc. |           |                   |                   | .271     |                         |                         | .690     |

|                         |      |      |      |      |      |      |
|-------------------------|------|------|------|------|------|------|
| < 1 time per week       | 38.7 | 38.5 | 39.0 |      | 38.1 | 41.6 |
| Once per week           | 25.9 | 26.7 | 24.9 |      | 26.5 | 22.8 |
| 2-3 times per week      | 20.6 | 21.6 | 19.6 |      | 20.4 | 21.6 |
| 4-6 times per week      | 8.2  | 7.8  | 8.6  |      | 8.4  | 7.2  |
| 1 or more times per day | 6.6  | 5.4  | 8.0  |      | 6.6  | 6.8  |
| Dark breads             |      |      |      | .124 |      | .378 |
| < 1 time per week       | 43.7 | 44.0 | 43.3 |      | 43.2 | 46.0 |
| Once per week           | 15.9 | 17.7 | 13.9 |      | 16.4 | 13.6 |
| 2-3 times per week      | 20.8 | 20.4 | 21.2 |      | 20.2 | 23.6 |
| 4-6 times per week      | 11.7 | 11.3 | 12.1 |      | 11.9 | 10.8 |
| 1 or more times per day | 7.9  | 6.6  | 9.5  |      | 8.4  | 6.0  |

Same subscript letters (a, b) indicate column proportions that are not significantly different from each other.

**Table S2.** Cooking self-efficacy of Midwestern university students by residence and food security status post-COVID-19 campus shift to online instruction ( $n=1434$ ).

|                                                                             | Residence |                   |                   | <i>p</i> | Food Security Status   |                         | <i>p</i> |
|-----------------------------------------------------------------------------|-----------|-------------------|-------------------|----------|------------------------|-------------------------|----------|
|                                                                             | Total (%) | At Home 53% (759) | On Own 47% (675)  |          | Food Secure 83% (1184) | Food Insecure 17% (250) |          |
|                                                                             | ← % →     |                   |                   |          | ← % →                  |                         |          |
| Follow recipe direction                                                     |           |                   |                   | .166     |                        |                         | <.001    |
| Not at all confident                                                        | 0.6       | 0.5               | 0.7               |          | 0.4 <sub>a</sub>       | 1.6 <sub>b</sub>        |          |
| A little confident                                                          | 2.1       | 1.5               | 2.8               |          | 1.4 <sub>a</sub>       | 5.6 <sub>b</sub>        |          |
| Somewhat confident                                                          | 15.0      | 16.2              | 13.6              |          | 14.8 <sub>a</sub>      | 16.0 <sub>a</sub>       |          |
| Very confident                                                              | 82.3      | 81.8              | 82.8              |          | 83.4 <sub>a</sub>      | 76.8 <sub>b</sub>       |          |
| Prepare a meal                                                              |           |                   |                   | <.001    |                        |                         | .216     |
| Not at all confident                                                        | 1.4       | 2.0 <sub>a</sub>  | 0.7 <sub>b</sub>  |          | 1.4                    | 1.6                     |          |
| A little confident                                                          | 5.5       | 6.7 <sub>a</sub>  | 4.1 <sub>b</sub>  |          | 5.0                    | 8.0                     |          |
| Somewhat confident                                                          | 18.4      | 23.1 <sub>a</sub> | 13.2 <sub>b</sub> |          | 18.9                   | 16.0                    |          |
| Very confident                                                              | 74.7      | 68.2 <sub>a</sub> | 81.9 <sub>b</sub> |          | 74.7                   | 74.4                    |          |
| Make a lettuce and chopped vegetable salad                                  |           |                   |                   | .422     |                        |                         | <.001    |
| Not at all confident                                                        | 2.9       | 2.4               | 3.4               |          | 2.3 <sub>a</sub>       | 5.6 <sub>b</sub>        |          |
| A little confident                                                          | 6.7       | 6.1               | 7.4               |          | 5.6 <sub>a</sub>       | 12.0 <sub>b</sub>       |          |
| Somewhat confident                                                          | 16.2      | 6.9               | 15.4              |          | 16.3 <sub>a</sub>      | 15.6 <sub>a</sub>       |          |
| Very confident                                                              | 74.2      | 74.7              | 73.8              |          | 75.8 <sub>a</sub>      | 66.8 <sub>b</sub>       |          |
| Prepare a mixture such as a stir-fry                                        |           |                   |                   | <.001    |                        |                         | .007     |
| Not at all confident                                                        | 7.7       | 10.3 <sub>a</sub> | 4.9 <sub>b</sub>  |          | 7.4 <sub>a</sub>       | 9.2 <sub>a</sub>        |          |
| A little confident                                                          | 16.2      | 18.2 <sub>a</sub> | 13.9 <sub>b</sub> |          | 15.7 <sub>a</sub>      | 18.4 <sub>a</sub>       |          |
| Somewhat confident                                                          | 25.1      | 27.2 <sub>a</sub> | 22.7 <sub>b</sub> |          | 23.8 <sub>a</sub>      | 31.2 <sub>b</sub>       |          |
| Very confident                                                              | 51.0      | 44.3 <sub>a</sub> | 58.5 <sub>b</sub> |          | 53.1 <sub>a</sub>      | 41.2 <sub>b</sub>       |          |
| Prepare a mixture such as a casserole or 'hotdish'                          |           |                   |                   | .008     |                        |                         | .001     |
| Not at all confident                                                        | 9.8       | 10.7 <sub>a</sub> | 8.7 <sub>a</sub>  |          | 8.5 <sub>a</sub>       | 16.0 <sub>b</sub>       |          |
| A little confident                                                          | 18.4      | 20.2 <sub>a</sub> | 16.3 <sub>a</sub> |          | 18.5 <sub>a</sub>      | 17.6 <sub>a</sub>       |          |
| Somewhat confident                                                          | 24.2      | 25.7 <sub>a</sub> | 22.5 <sub>a</sub> |          | 23.7 <sub>a</sub>      | 26.8 <sub>a</sub>       |          |
| Very confident                                                              | 47.7      | 43.4 <sub>a</sub> | 52.4 <sub>b</sub> |          | 49.4 <sub>a</sub>      | 39.6 <sub>b</sub>       |          |
| Prepare baked goods (such as bread, cake, cookies, or muffins) from scratch |           |                   |                   | .016     |                        |                         | .008     |
| Not at all confident                                                        | 11.2      | 9.9 <sub>a</sub>  | 12.6 <sub>a</sub> |          | 10.0 <sub>a</sub>      | 16.8 <sub>b</sub>       |          |
| A little confident                                                          | 16.8      | 16.4 <sub>a</sub> | 17.3 <sub>a</sub> |          | 16.5 <sub>a</sub>      | 18.4 <sub>a</sub>       |          |
| Somewhat confident                                                          | 22.3      | 20.2 <sub>a</sub> | 24.6 <sub>b</sub> |          | 23.1 <sub>a</sub>      | 18.4 <sub>a</sub>       |          |
| Very confident                                                              | 49.8      | 53.6 <sub>a</sub> | 45.5 <sub>b</sub> |          | 50.5 <sub>a</sub>      | 46.4 <sub>a</sub>       |          |
| Create a hot meal from scratch without needing to follow a recipe           |           |                   |                   | <.001    |                        |                         | .300     |
| Not at all confident                                                        | 19.8      | 25.6 <sub>a</sub> | 13.3 <sub>b</sub> |          | 19.9                   | 19.2                    |          |
| A little confident                                                          | 22.2      | 26.1 <sub>a</sub> | 17.8 <sub>b</sub> |          | 22.8                   | 19.2                    |          |
| Somewhat confident                                                          | 21.4      | 21.4 <sub>a</sub> | 21.5 <sub>a</sub> |          | 21.7                   | 20.0                    |          |
| Very confident                                                              | 36.6      | 26.9 <sub>a</sub> | 47.4 <sub>b</sub> |          | 35.5                   | 41.6                    |          |

Same subscript letters (a, b) indicate column proportions that are not significantly different from each other.
